# Supplementary material for: A new genus of giant salamander (Urodela, Cryptobranchidae) from the Pliocene of Japan
Source: PeerJ. 2026 Jun 3;14:e21362. doi: 10.7717/peerj.21362 (PMC13242194; doi:10.7717/peerj.21362)
Supplement: Supplemental Information 1 [file peerj-14-21362-s001.xlsx]

## Sheet: Supplementary Table 1
Species	Prezygapophyses (dorsal view)	Base of prezygapophyses (anterior view)	Ventral alignment of transverse processes (anterior and posterior views)	Reference
Ajimu specimen (LBM0142000335)	strongly laterally directed	strongly developed	straight	This study
Andrias japonicus	anterolaterally directed	weakly developed	sloping	This study
Andrias scheuchzeri	not preserved	weakly developed	not preserved	Szentesi et al. (2019)
Andrias matthewi	anterolaterally directed	weakly developed	sloping	This study, Meszoely (1966)
Aviturus exsecratus	strongly laterally directed	moderately developed	sloping	This study, Gubin (1991), Vasilyan et al. (2012)
Cryptobranchus alleganiensis	anterolaterally directed	weakly developed	sloping	This study
Cryptobranchus saskatchewanensis	not preserved	weakly developed	not preserved	This study, Naylor (1981)
Ukrainurus hypsognathus	anterolaterally directed	weakly developed	sloping	Vasilyan et al. (2013)
Zaissanurus beliajevae	anterolaterally directed	weakly developed	not preserved	This study, Chernov (1959)
