# Supplementary material for: A new genus of giant salamander (Urodela, Cryptobranchidae) from the Pliocene of Japan
Source: PeerJ. 2026 Jun 3;14:e21362. doi: 10.7717/peerj.21362 (PMC13242194; doi:10.7717/peerj.21362)
Supplement: Supplemental Information 2 [file peerj-14-21362-s002.xlsx]

## Sheet: Supplementary Table 2
Species	Specimen Number	CL (mm)	CH (mm)	CH/CL	2nd trunk vertebra			4th trunk vertebra			12th trunk vertebra			18th trunk vertebra			References
					CL	CH	CH/CL	CL	CH	CH/CL	CL	CH	CH/CL	CL	CH	CH/CL
Andrias japonicus	KUZ-KYB7218				14.74	10.14	0.687924	15.65	10.28	0.656869	17.68	10.48	0.59276	16.31	10.02	0.614347	This study
Andrias japonicus	KUHE66656				10.92	7.28	0.666667	12.15	7.12	0.586008	13.06	7.16	0.548239	12.68	6.91	0.544953	This study
Andrias japonicus	JMC Digital CT Museum of Life No.16				14.09	9.55	0.677786	16.14	9.14	0.566295	16.75	9.22	0.550448	16.08	9.51	0.591418	This study
Andrias japonicus	KUHE38393				10.65	6.77	0.635681	11.91	7.11	0.596977	13.75	7.48	0.544	12.69	6.91	0.544523	This study
Cryptobranchus alleganiensis	KUHE38389				7.73	4.01	0.518758	9.61	4.56	0.474506	11.22	4.68	0.417112	10.44	4.25	0.407088	This study
Cryptobranchus alleganiensis	UMUT-A1807				8.91	4.68	0.525253	9.75	4.97	0.509744	12.37	5.11	0.413096	11.94	4.73	0.396147	This study
Cryptobranchus alleganiensis	NSMT-H14544				7.31	3.71	0.507524	7.87	3.74	0.475222	8.49	3.65	0.429918	8.59	3.21	0.37369	This study
Ajimu specimens	LBM14200335	22.94	19.145	0.834568													This study
Ajimu specimens	LBM14200337	20.05	16.29	0.812469													This study
Andrias scheuchzeri	JAMT201921	28.15	18.72	0.665009													Szentesi et al. (2019)
Andrias scheuchzeri	JAMT201931	24.61	17.61	0.715563													Szentesi et al. (2019)
Andrias matthewi	AMNH-FARB8336	27.415	19.48	0.71056													This study
Andrias matthewi	AMNH-FARB8650	31.205	17.55	0.56241													This study
Andrias matthewi	AMNH-FARB8652	23.29	15.595	0.669601													This study
Andrias matthewi	AMNH-FARB10500	25.875	16.36	0.632271													This study
Andrias matthewi	AMNH-FARB10506	25.82	17.3	0.670023													This study
Andrias matthewi	AMNH-FARB42912	24.29	16.92	0.696583													This study
Cryptobranchus saskatchewanensis	UALVP14875	13.515	8.795	0.650758													This study
Aviturus exsecratus	PIN4356	37.57	26.235	0.698297													This study
Zaissanurus beliajevae	ZSN-KK-1	23.165	17.465	0.753939													This study
Ukrainurus hypsognathus	NMNHK22-1699	31.428	23.016	0.732341													Vasilyan et al. (2013)
